# Supplementary material
Source: PubMed Central journal article supplement (PMC1502449)

**a** ← cleavage

...DVFD**GPAAQPSLGPTPEEAFLS**PGP  
EDIGPPIPEADELLNKFVCKNNGVLFEN  
QLLQIGVKSEFRQNLGRMYLFYGNKTS  
VQFQNFSPTVVHPGDLQTQLAVQTKR  
VAAQVDGGAQVQQVLNIECLRDFLTP  
PLLSVRFRYGGAPQALTLKLPVTINKF  
FQPTEMAAQDFQRWKQLSLPQQEA  
QKIFKANHPMDAEVTKAKLLGFGSALL  
DNVDPNPENFVGAGIIQTKALQVGCLL  
RLEPNAQAQMYRLTLRTSKEPVSRLH  
CELLAQQF

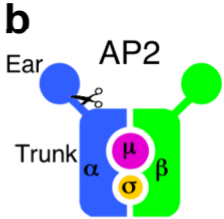

Supplement: pnas_0604044103_3.pdf [file pnas_0604044103_3.pdf]
