# Supplementary material
Source: PubMed Central journal article supplement (PMC1502449)

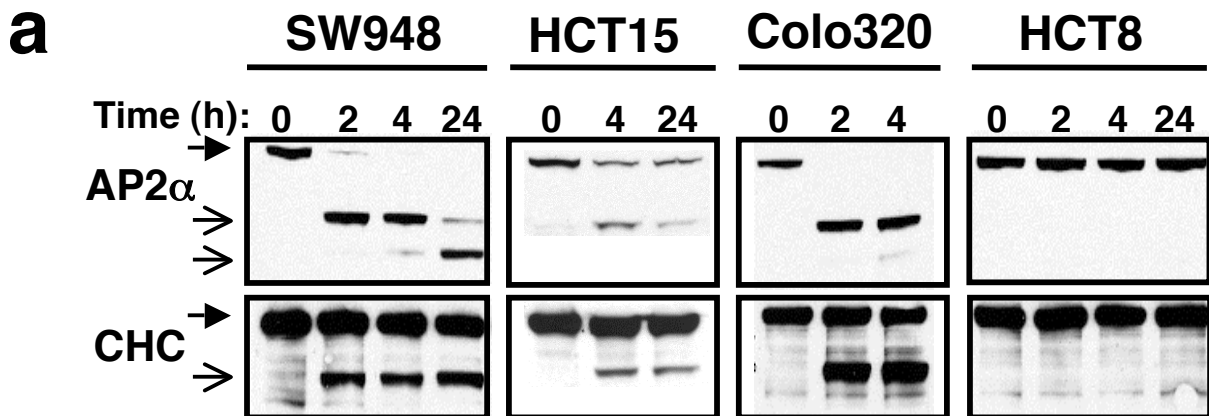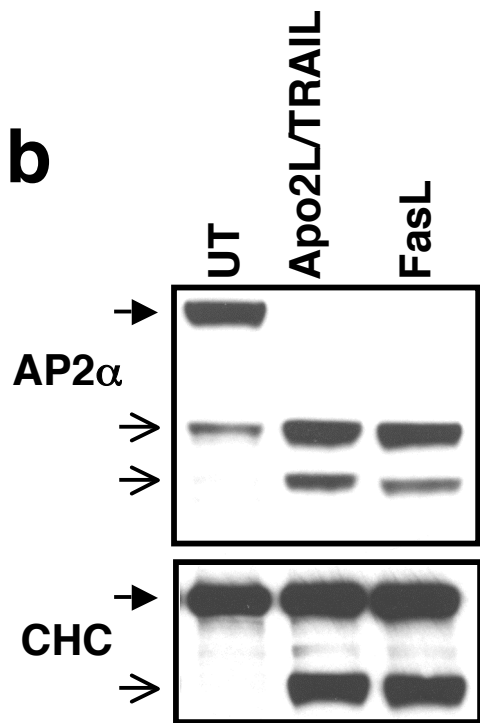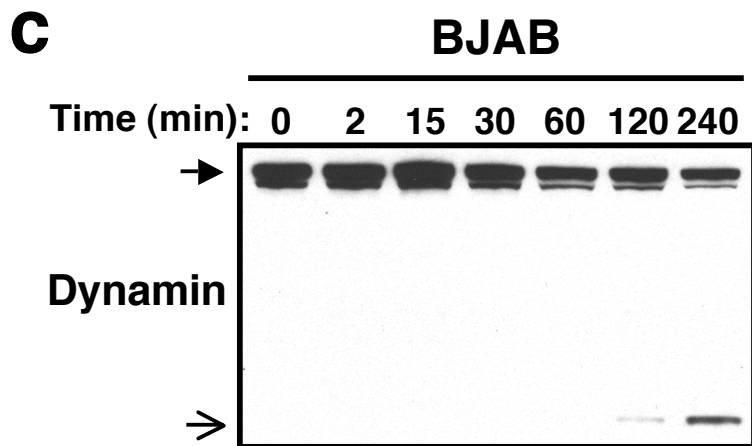

Supplement: pnas_0604044103_1.pdf [file pnas_0604044103_1.pdf]

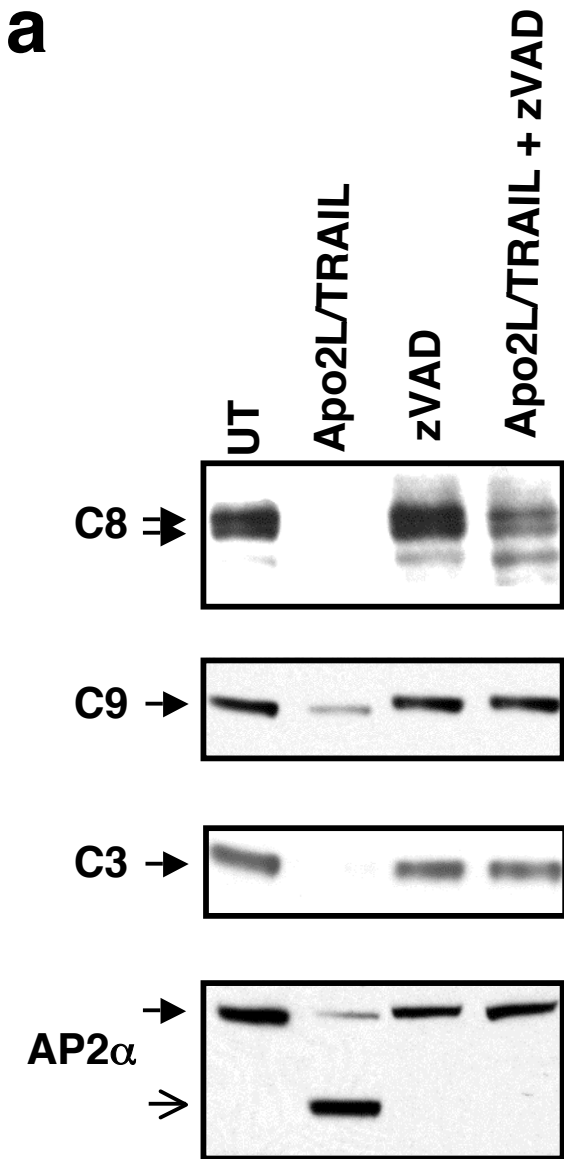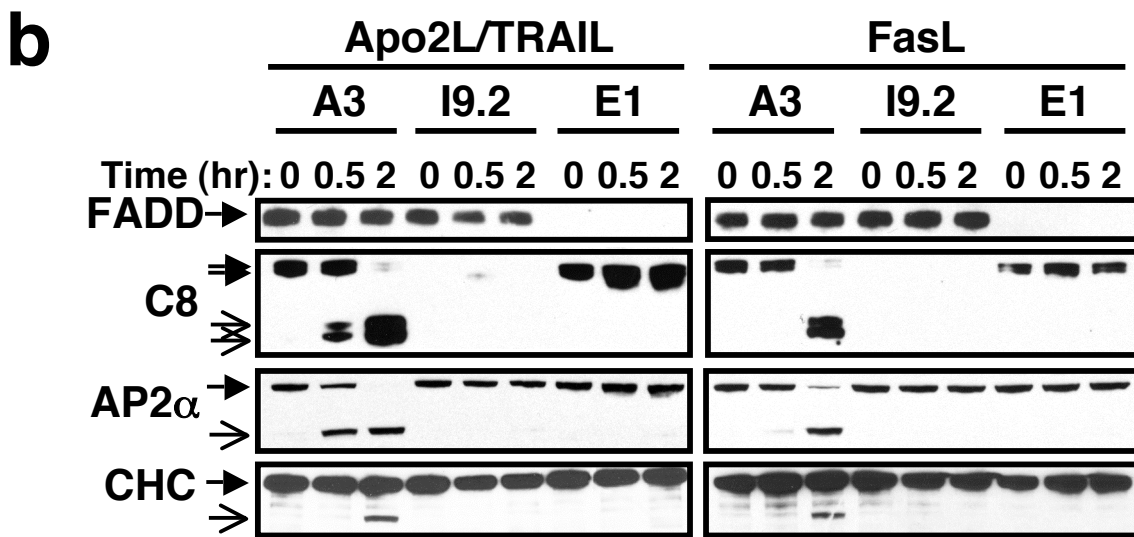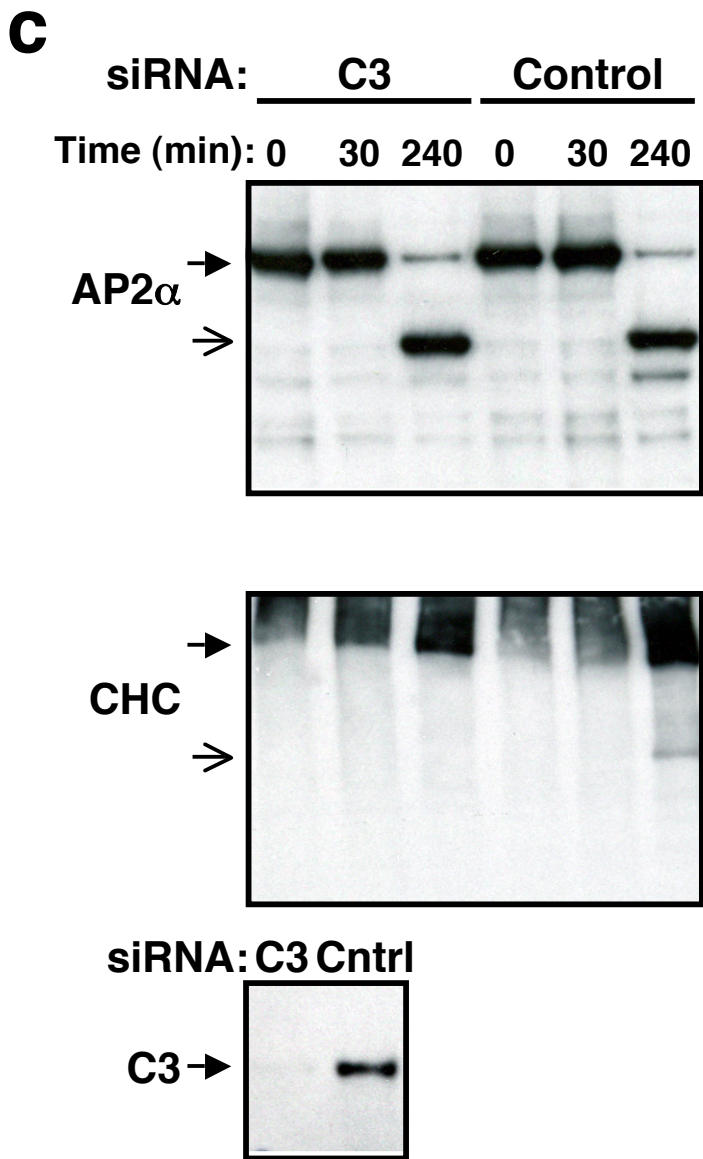

Supplement: pnas_0604044103_2.pdf [file pnas_0604044103_2.pdf]

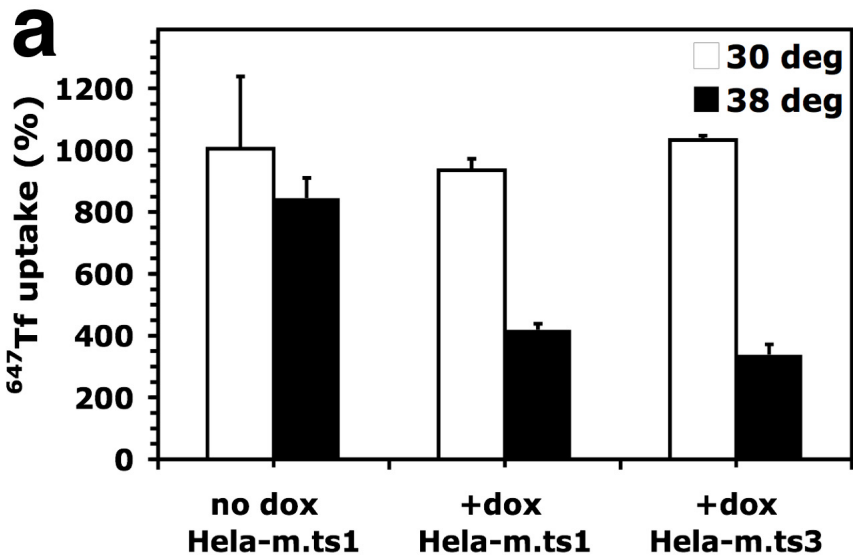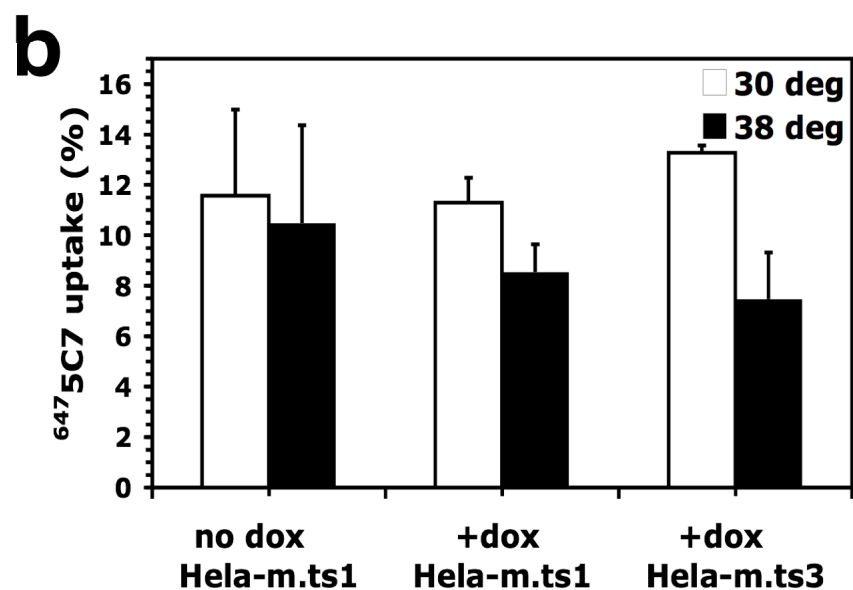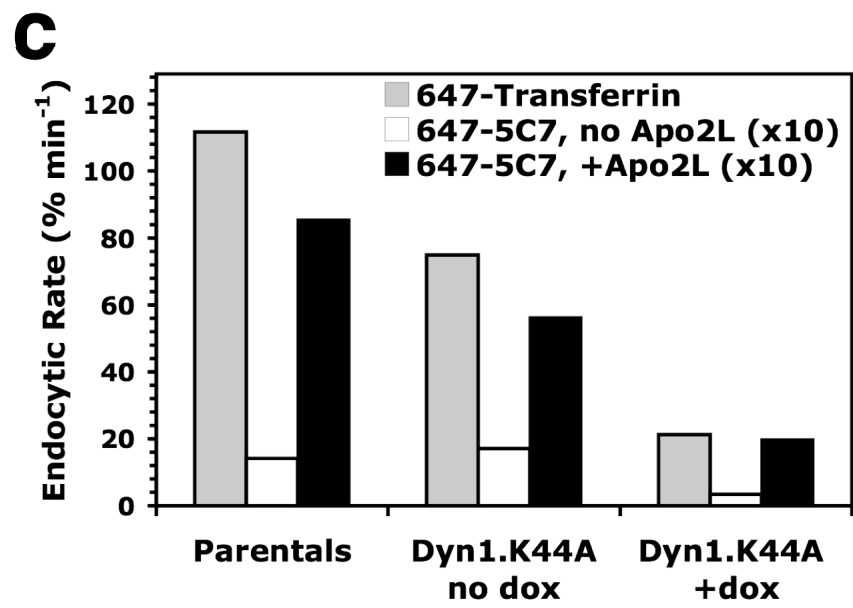

Supplement: pnas_0604044103_4.pdf [file pnas_0604044103_4.pdf]

**a**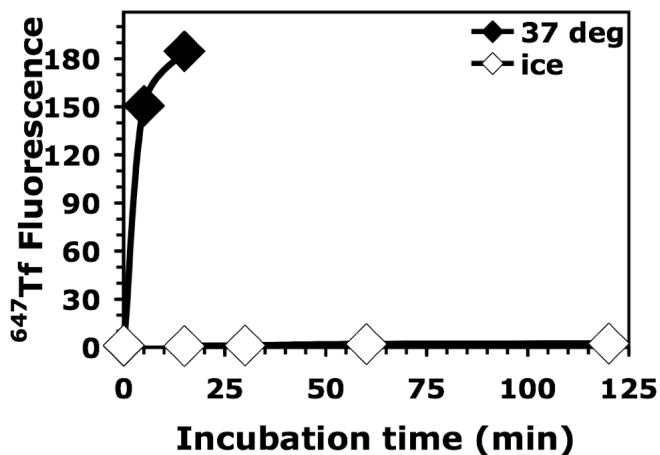**d**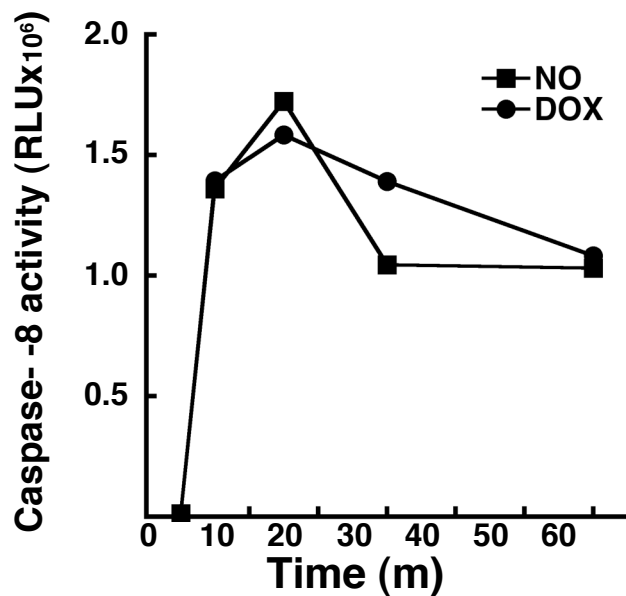**b**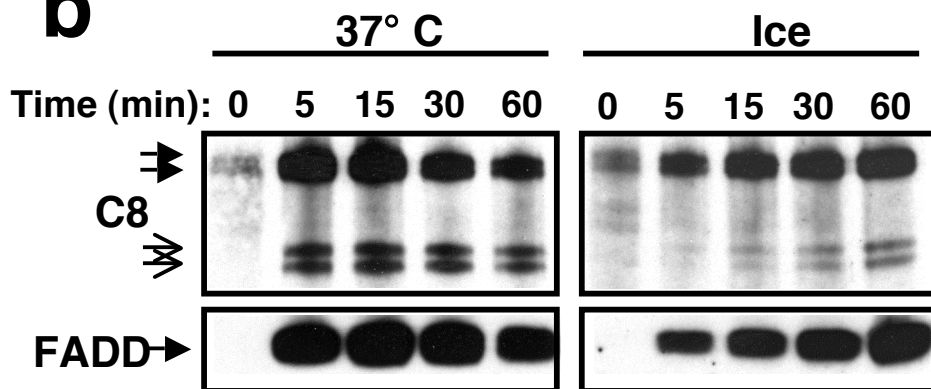**c**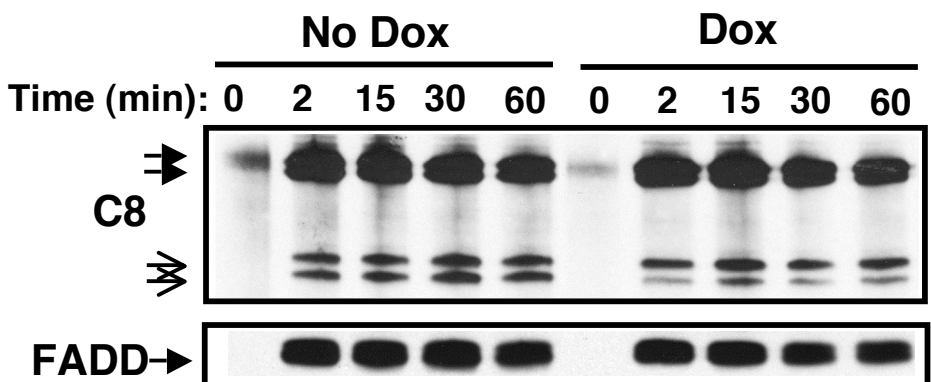

Supplement: pnas_0604044103_5.pdf [file pnas_0604044103_5.pdf]

**BJAB****Colo205****V****D****D**

Time (h): 0 24 48 48

0 24

**C8****C3****C7****AP2 $\alpha$** **AP1/2 $\beta$** **CHC**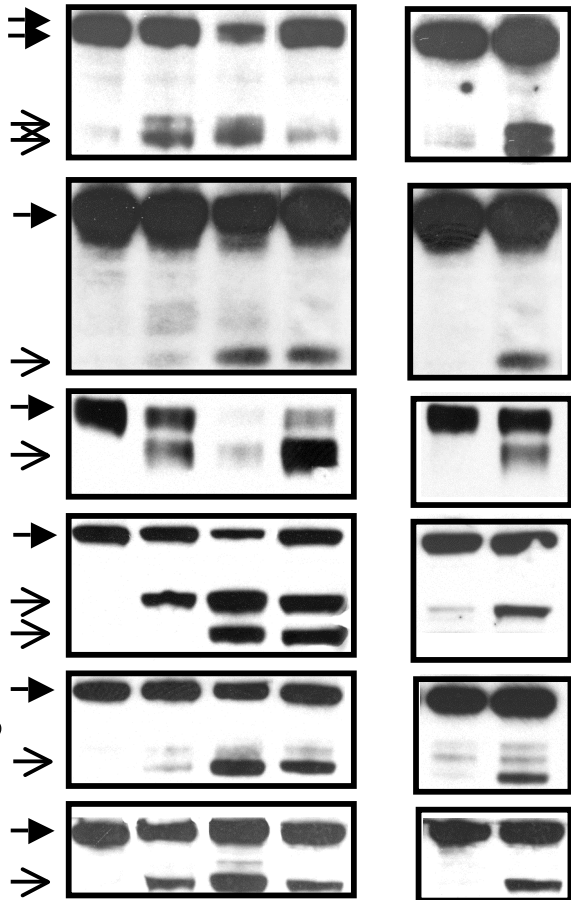

Supplement: pnas_0604044103_6.pdf [file pnas_0604044103_6.pdf]
